# Supplementary material for: Core outcome set for diabetes after pregnancy prevention across the life span: international Delphi study
Source: HighWire-hosted journal article supplement (doi:10.1136/bmjdrc-2020-001594), 2020-11-01
Supplement: bmjdrc-2020-001594supp001_data_supplement.pdf [file bmjdrc-2020-001594supp001_data_supplement.pdf]

| <b>S1. Additional outcomes voted for inclusion by consensus panel</b>                                                                 |                             |                                                                                        |
|---------------------------------------------------------------------------------------------------------------------------------------|-----------------------------|----------------------------------------------------------------------------------------|
| <b>Outcome</b>                                                                                                                        | <b>% of votes<br/>"in"*</b> | <b>Rationale</b>                                                                       |
| Indeterminate outcomes from the Delphi survey                                                                                         |                             |                                                                                        |
| Dyslipidemia                                                                                                                          | 71.4                        | Risk factor for cardiovascular disease and prevalent in type 2 diabetics               |
| Gestational hypertension                                                                                                              | 78.6                        | Risk factor for post-pregnancy cardiovascular disease                                  |
| Length of breastfeeding                                                                                                               | 100                         | Increases insulin sensitivity and improves glucose metabolism in the mother            |
| Breastfeeding exclusivity                                                                                                             | 71.4                        | Increases insulin sensitivity and improves glucose metabolism in the mother            |
| Infant birth weight and length for gestational age                                                                                    | 71.4                        | Women with GDM are more likely to have macrosomic babies                               |
| Diabetes in the offspring                                                                                                             | 71.4                        | May indicate elevated risk of diabetes and CV disease in mother                        |
| Health status for cost evaluation                                                                                                     | 78.6                        | Cost evaluation will be important to implementation                                    |
| Study participation                                                                                                                   | 71.4                        | May help assess presence of barriers/enablers to completion of an intervention program |
| Suggestions from consensus panel discussion                                                                                           |                             |                                                                                        |
| Maternal hypertensive disease                                                                                                         | 78.6                        | Includes diseases beyond gestational hypertension                                      |
| Infant hospitalization in neonatal care unit                                                                                          | 85.7                        | May indicate elevated risk of diabetes and CV disease in mother                        |
| Sugary beverage intake                                                                                                                | 78.6                        | Health behaviour associated with diabetes and CV disease                               |
| *Number of voting members differed for outcomes of each origin: n=15 for indeterminate outcomes, n=14 for consensus panel suggestions |                             |                                                                                        |
