# Supplementary material for: Core outcome set for diabetes after pregnancy prevention across the life span: international Delphi study
Source: HighWire-hosted journal article supplement (doi:10.1136/bmjdrc-2020-001594), 2020-11-01
Supplement: bmjdrc-2020-001594supp002_data_supplement.pdf [file bmjdrc-2020-001594supp002_data_supplement.pdf]

| <b>S2. Round 2 scores for outcomes that met inclusion criteria in the Delphi survey in descending order</b> |                                                       |
|-------------------------------------------------------------------------------------------------------------|-------------------------------------------------------|
| <b>Outcome</b>                                                                                              | <b>Percent of all participants rating outcome 7-9</b> |
| Gestational diabetes mellitus recurrence                                                                    | 98.3                                                  |
| Diagnosis of type 2 diabetes                                                                                | 96.8                                                  |
| Attending postpartum diabetes screening test                                                                | 95.2                                                  |
| Weight                                                                                                      | 94                                                    |
| Total energy intake                                                                                         | 93.1                                                  |
| Healthy lifestyle behaviours                                                                                | 92.9                                                  |
| Completion of OGTT/blood glucose/HbA1c post partum                                                          | 92.1                                                  |
| Diabetes knowledge                                                                                          | 89.5                                                  |
| Diabetes prevention behaviour knowledge                                                                     | 89.5                                                  |
| Motivation to change                                                                                        | 89.5                                                  |
| Oral glucose tolerance test (OGTT)                                                                          | 89.3                                                  |
| Fasting blood glucose                                                                                       | 89.2                                                  |
| Body mass index                                                                                             | 88                                                    |
| Diet quality                                                                                                | 87.9                                                  |
| Completion of targets/activities                                                                            | 87.5                                                  |
| Perceived diabetes risk                                                                                     | 86                                                    |
| Glycated hemoglobin test                                                                                    | 84.5                                                  |
| Carbohydrate intake                                                                                         | 84.5                                                  |
| Sedentary time                                                                                              | 84.5                                                  |
| Cardiovascular disease                                                                                      | 82.5                                                  |
| Health service utilisation and cost                                                                         | 82.2                                                  |
| Moderate to vigorous activity                                                                               | 81.1                                                  |
| Fat intake                                                                                                  | 79.3                                                  |
| Post-partum weight retention                                                                                | 79.1                                                  |
| Social support                                                                                              | 79                                                    |
| Diagnosis of type 1 diabetes                                                                                | 77.8                                                  |
| Saturated fat intake                                                                                        | 77.7                                                  |
| Intervention components engaged with                                                                        | 76.7                                                  |
| Quality of Life                                                                                             | 76.2                                                  |
| Fibre intake                                                                                                | 75.9                                                  |
| Diet self-efficacy                                                                                          | 75.4                                                  |
| Neonatal mortality/stillbirth                                                                               | 75.1                                                  |
| Diastolic blood pressure                                                                                    | 74.6                                                  |
| LDL cholesterol                                                                                             | 74.6                                                  |
| Perceived barriers                                                                                          | 73.7                                                  |
| Whether goals were set for the woman and achieved                                                           | 73.1                                                  |

|                         |      |
|-------------------------|------|
| Food group servings     | 72.4 |
| Glycaemic load          | 72.4 |
| Health literacy         | 72   |
| Weight self-efficacy    | 72   |
| Waist circumference     | 71.7 |
| Hypertension            | 71.4 |
| Systolic blood pressure | 71.4 |
| Intensity of exercise   | 70.6 |
| Sleep quality           | 70.6 |
| HDL cholesterol         | 69.9 |
